# Supplementary material for: Flexible core–shell difunctional nanoreactor CsPbBr3@Bi2MoO6–CuS/PAN for real-time monitoring of photocatalysis
Source: Royal Society of Chemistry journal article supplement (doi:10.1039/d5ta02027a), 2025-01-01
Supplement: d5ta02027a1.pdf [file d5ta02027a1.pdf]

## Supplementary Material

### **Flexible core-shell difunctional nanoreactor CsPbBr<sub>3</sub>@Bi<sub>2</sub>MoO<sub>6</sub>-CuS/PAN for real-time monitoring photocatalysis**

X. W. Zhao<sup>†a</sup>, J. X. Yang<sup>†b</sup>, L. F. Shen<sup>\*c</sup>, E. Y. B. Pun<sup>d</sup>, H. Lin<sup>\*a,d</sup>

<sup>a</sup>School of Textile and Material Engineering, Dalian Polytechnic University, Dalian, 116034, P.R. China

<sup>b</sup>School of Biomedical Engineering and Technology, Tianjin Medical University, Tianjin, 300070, P.R. China

<sup>c</sup>Key Laboratory of Optoelectronics Technology, School of Information Science and Technology, Beijing University of Technology, Beijing, 100124, P.R. China

<sup>d</sup>Department of Electrical Engineering and State Key Laboratory of Terahertz and Millimeter Waves, City University of Hong Kong, Hong Kong Special Administrative Region, 999077, P.R. China

E-mail: [shenlifan@bjut.edu.cn](mailto:shenlifan@bjut.edu.cn); [linhaidlpu@163.com](mailto:linhaidlpu@163.com)

<sup>†</sup> These authors contributed equally to this work.

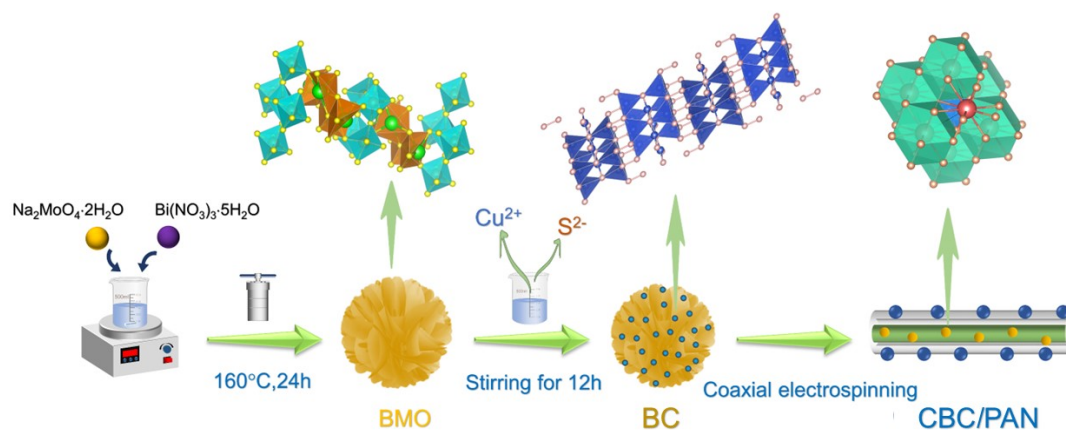

**Fig. S1** The preparation process of CPB@CuS/BMO.

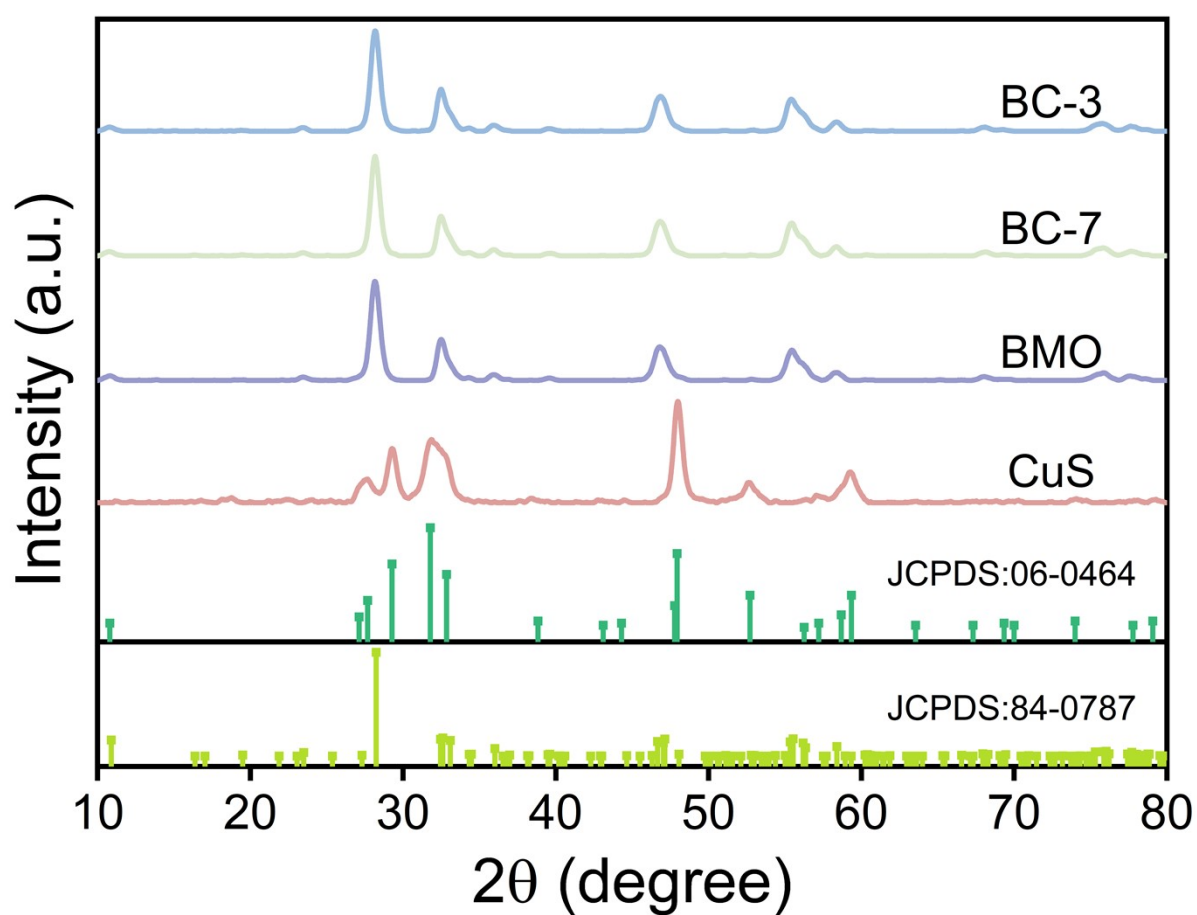

**Fig. S2** XRD patterns of BC-3, BC-7, BMO, CuS.

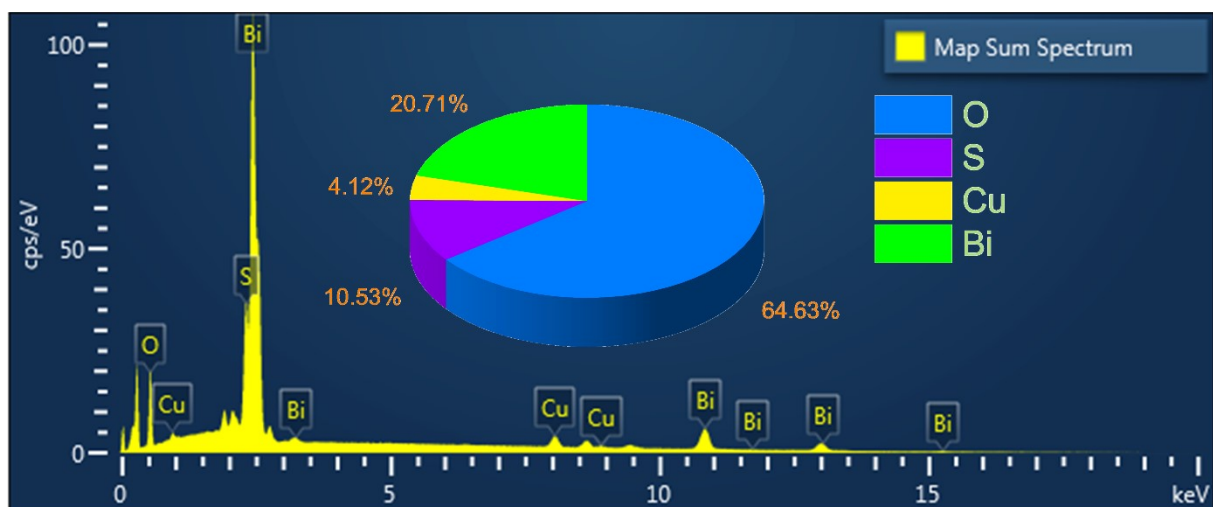

**Fig. S3** Corresponding elemental mapping images of BC-5.

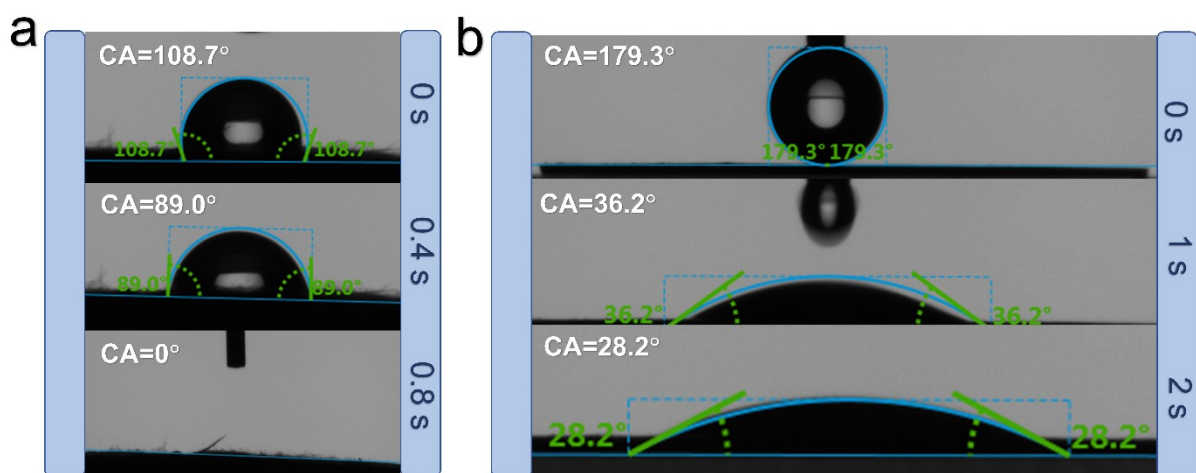

**Fig. S4** Contact angle (CA) of (a) CCB fiber and (b) BC-5 for water.

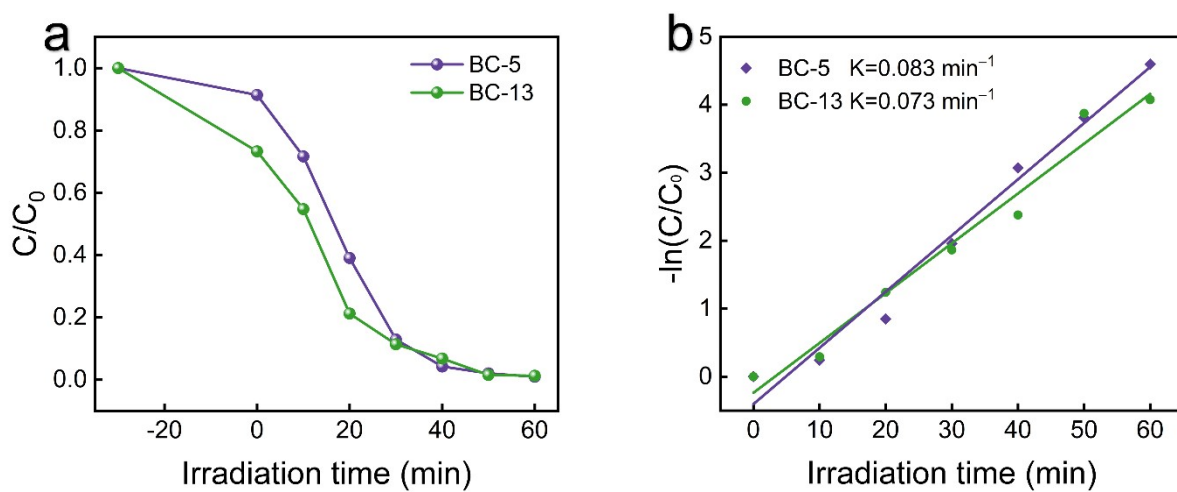

**Fig. S5** (a) Photocatalytic degradation curves of RhB by BC-5 and BC-13 under simulated sunlight irradiation. (b) First-order kinetic fitting curves of RhB by BC-5 and BC-13.

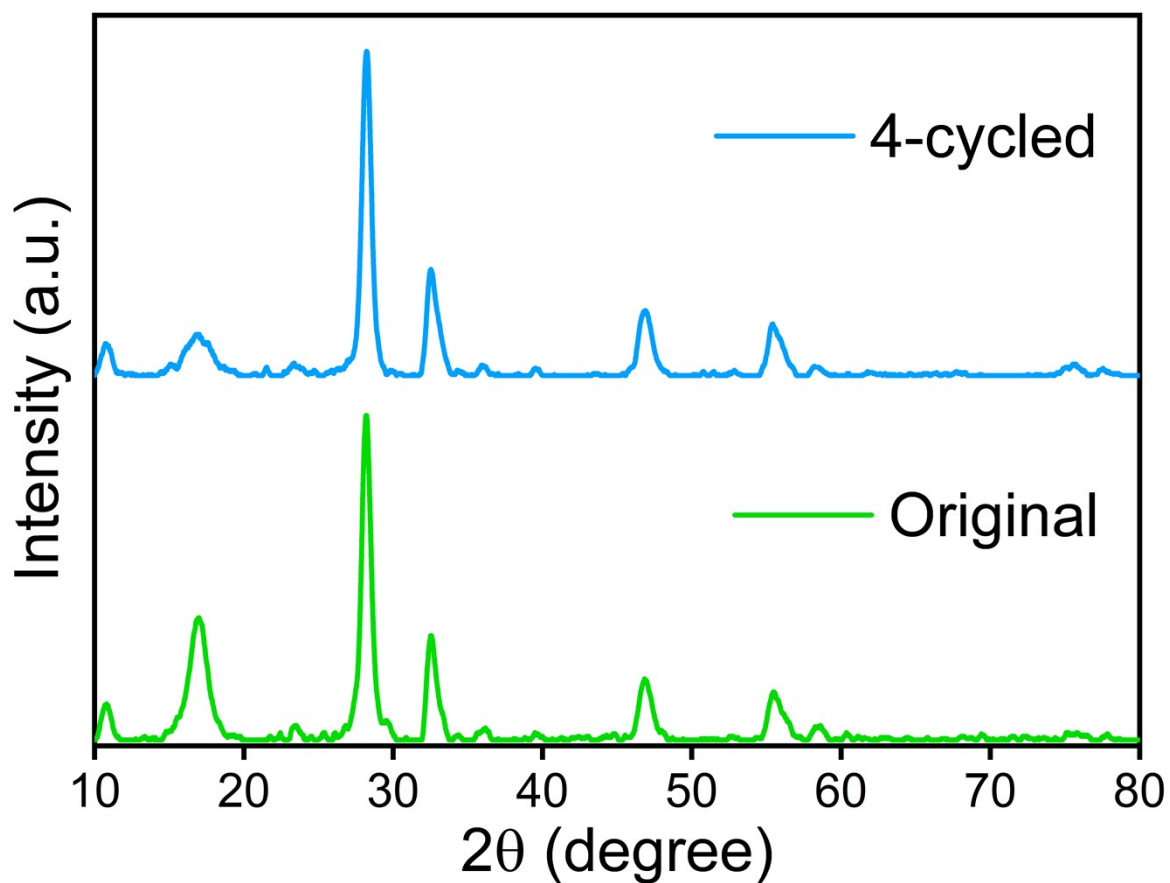

**Fig. S6** XRD patterns of CCB fiber before and after photocatalysis.

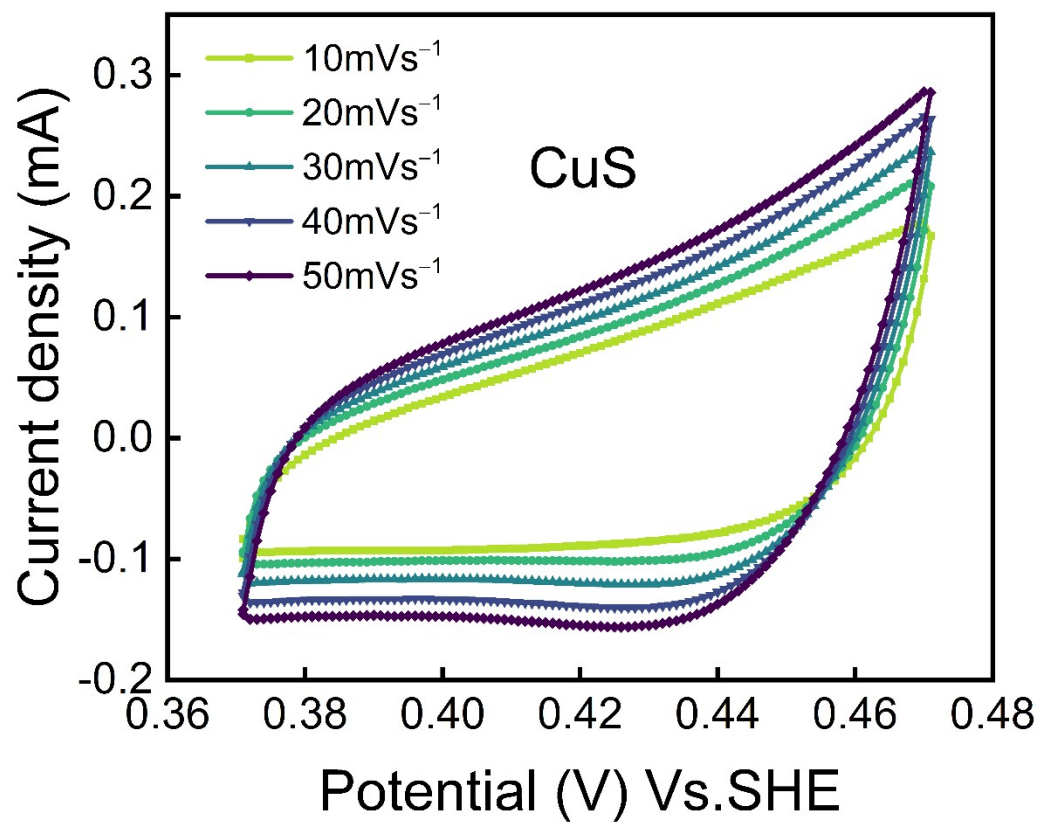

**Fig. S7** CV plots of CuS.

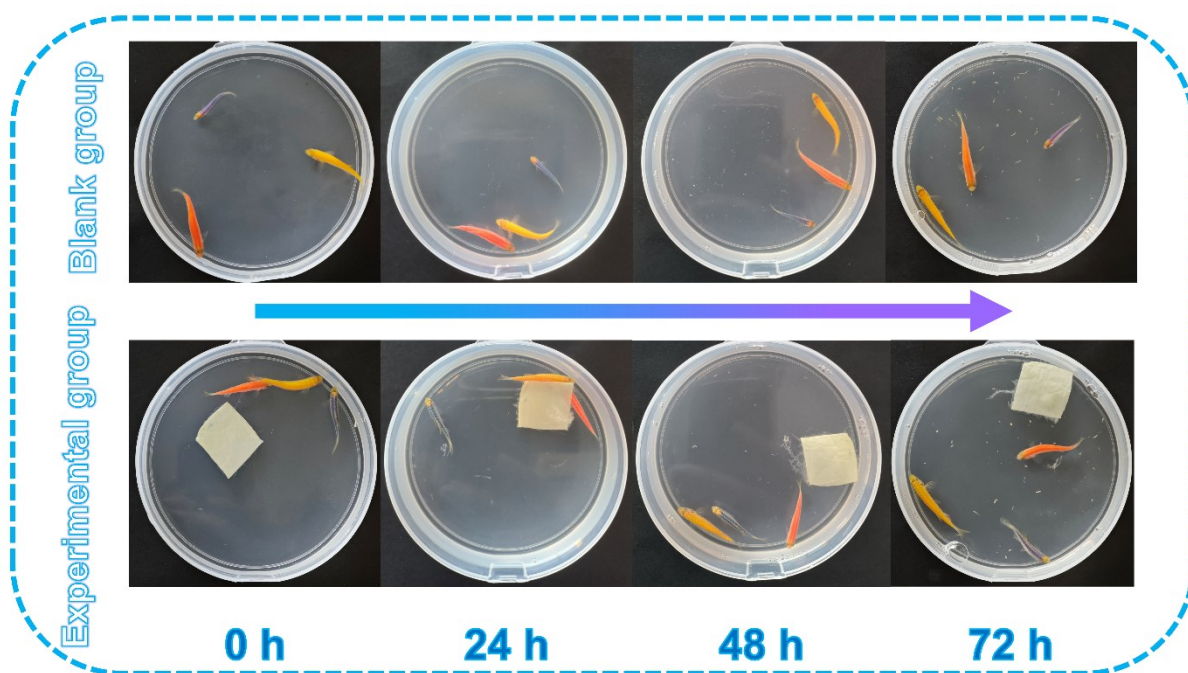

**Fig. S8** Digital photographs of zebrafish co-cultured with CBC/PAN fiber in water for 72 h  
(recorded every 24 h).
